# Supplementary material for: International multi-stakeholder collaboration to support implementation of cancer care efficiency metrics: A qualitative study to develop the All. Can Action Guide
Source: Research Square preprint supplement (doi:10.21203/rs.3.rs-6429529/v1), 2025-06-09
Supplement: Supplementary file 1 [file 0a2e1cb4e85fca2c75f29ead.pdf]

**Additional file 8 – List of barriers and enablers per cluster mapped to the attributes of the ICON Framework and grouped in sub-categories**

**Barriers and enablers of time-dependent metrics (n=80) mapped to the attributes of the ICON Framework and grouped in sub-categories**

|                                                                                                             | Barrier   | Enabler |
|-------------------------------------------------------------------------------------------------------------|-----------|---------|
| <b>REGULATORY INFLUENCES (ICON ATTRIBUTE), n=50 (63%)</b>                                                   |           |         |
| <b>Long term strategic planning and standardised care pathways</b>                                          |           |         |
| Standardised cancer care pathways at National level                                                         | (lack of) |         |
| Long-term National strategic planning document and clarity of the strategic anchoring of efficiency metrics |           |         |
| <b>Laws and legislation</b>                                                                                 |           |         |
| Legislation supporting cancer data collection                                                               |           |         |
| Legislation regarding cancer registration managed by National cancer entity                                 |           |         |
| Different strategies/regulations between regions/ provinces/ territories and federal/national               |           |         |
| <b>National approach regarding cancer data/cancer registries</b>                                            |           |         |
| National approach regarding cancer data                                                                     | (lack of) |         |
| National approach regarding cancer registry                                                                 | (lack of) |         |
| Limited population coverage in cancer registries                                                            |           |         |
| National cancer registries used for quality monitoring                                                      |           |         |
| Semi-automatic data flows in Cancer Registration programme                                                  |           |         |
| National cancer registries used to support decision-making of the MoH                                       |           |         |
| <b>Maturity of data ecosystem</b>                                                                           |           |         |
| Developed data ecosystem                                                                                    |           |         |
| Electronic health record                                                                                    | (lack of) |         |
| Interoperability (lack of interoperability leading to data siloing)                                         | (lack of) |         |
| Nation-wide unique patient identifier (UPI) for data linkage                                                | (lack of) |         |
| Centralization of data collection by one organization                                                       |           |         |
| Accessibility of data from Primary Health Care                                                              | (lack of) |         |
| <b>Systematic and harmonised data collection</b>                                                            |           |         |
| Systematized data collection                                                                                | (lack of) |         |
| Regular consolidation and report of data                                                                    | (lack of) |         |
| <b>Availability of data for secondary use, including performance measurement</b>                            |           |         |
| Inclusiveness - Patient retain power over their data                                                        |           |         |
| Strategy implemented regarding data sharing                                                                 | (lack of) |         |
| Access to clinical data secondary uses                                                                      | (lack of) |         |
| Reporting mechanisms to National Health Institutes                                                          | (lack of) |         |
| Quality assurance mechanisms, with penalties to hospitals not complying                                     |           |         |
| Metrics are collected but are not publicly reported                                                         |           |         |

| <b>POLITICAL INFLUENCES (ICON ATTRIBUTE), n=16 (20%)</b>                            |           |  |
|-------------------------------------------------------------------------------------|-----------|--|
| <b>Political will</b>                                                               |           |  |
| Political will                                                                      | (lack of) |  |
| National law of low quality and needing revision                                    |           |  |
| Time investment required to develop Cancer Registries                               |           |  |
| <b>Political organisation</b>                                                       |           |  |
| Mandates between National/ federal and regional /provinces/territories              |           |  |
| Inclusiveness and collaboration at decision-making                                  |           |  |
| <b>External political pressure</b>                                                  |           |  |
| International pressure, namely from Europe                                          |           |  |
| <b>INTERCOMMUNITY/ INTERORGANIZATIONAL/ INTERSECTORAL RELATIONSHIPS, n=13 (16%)</b> |           |  |
| Coordination with Primary care                                                      |           |  |
| Data reporting not useful for clinical work                                         |           |  |
| Clarity regarding implementation and shared responsibilities among stakeholders     | (lack of) |  |
| <b>COMMUNITY INFLUENCES, n=1 (1%)</b>                                               |           |  |
| <b>Peer organizational pressure</b>                                                 |           |  |

**Barriers and enablers of coordination of care metrics (n=52) mapped to the attributes of the ICON Framework and grouped in sub-categories**

|                                                                                                                | Barrier   | Enabler |
|----------------------------------------------------------------------------------------------------------------|-----------|---------|
| <b>REGULATORY INFLUENCES (ICON ATTRIBUTE), n=39 (75%)</b>                                                      |           |         |
| <b>Oncology nurse specialists</b>                                                                              |           |         |
| Legal framework for the professional role of oncology nurses                                                   | (lack of) |         |
| Variability across jurisdictions of cancer nurses' scope of practice                                           |           |         |
| Role of mandated focal point/care coordinator underexplored                                                    |           |         |
| <b>Multidisciplinary teams</b>                                                                                 |           |         |
| Regulation of multidisciplinary teams profiles and responsibilities                                            | (lack of) |         |
| Heterogeneous regulation of multidisciplinary teams across regions/jurisdictions                               |           |         |
| Quality assurance mechanisms favour use of multidisciplinary teams                                             |           |         |
| Certification procedures ensure minimum requirements for multidisciplinary teams                               |           |         |
| Standardised care pathways support the institutionalisation of multidisciplinary teams                         |           |         |
| <b>Centralisation of care</b>                                                                                  |           |         |
| Multi-disciplinary organization of cancer care at hospital-level                                               |           |         |
| Centralisation of cancer care in specialized centres                                                           | (lack of) |         |
| <b>Task sharing and shifting</b>                                                                               |           |         |
| Regulation concerning task shifting and task sharing                                                           | (lack of) |         |
| Harmonisation concerning task shifting and task sharing                                                        | (lack of) |         |
| Professionalisation of a family medicine specialization in oncology (General Practitioners in Oncology (GPOs)) |           |         |
| <b>POLITICAL INFLUENCES (ICON ATTRIBUTE), n=6 (12%)</b>                                                        |           |         |
| Political will                                                                                                 | (lack of) |         |
| Availability of nurses                                                                                         | (lack of) |         |
| <b>COMMUNITY INFLUENCES, n=3 (6%)</b>                                                                          |           |         |
| National Association of Oncology Nurses established and engaged                                                |           |         |
| Patient advocacy organizations and NGOs support by providing care coordinators                                 |           |         |
| <b>INTERCOMMUNITY/ INTERORGANIZATIONAL/ INTERSECTORAL RELATIONSHIPS, n=3 (6%)</b>                              |           |         |
| Communication to primary care                                                                                  |           |         |
| <b>REGIONAL/ NATIONAL/ GLOBAL INFLUENCES ON HEALTH, n=1 (2%)</b>                                               |           |         |
| Unpopularity of nurses job after COVID-19 pandemic                                                             |           |         |

**Barriers and enablers of patient-reported metrics (n=46) mapped to the attributes of the ICON Framework and grouped in sub-categories**

|                                                                                    | Barrier   | Enabler |
|------------------------------------------------------------------------------------|-----------|---------|
| <b>POLITICAL INFLUENCES (ICON ATTRIBUTE), n=21 (46%)</b>                           |           |         |
| Political will                                                                     | (lack of) |         |
| Funding                                                                            | (lack of) |         |
| National approach to systematic data collection                                    | (lack of) |         |
| Unclear strategic purpose and use                                                  |           |         |
| <b>COMMUNITY INFLUENCES, n=10 (22%)</b>                                            |           |         |
| Low levels of health literacy                                                      |           |         |
| Societal advocacy groups with no connection to the health care system              |           |         |
| Advocacy efforts by patient groups and NGOs                                        |           |         |
| Organizations' will to include patient perspectives                                |           |         |
| <b>REGULATORY INFLUENCES (ICON ATTRIBUTE), n=10 (22%)</b>                          |           |         |
| Standardised approach                                                              | (lack of) |         |
| Use of standardised tools (National or International)                              |           |         |
| No embedding in existing cancer registries or databases                            |           |         |
| Enforcement mechanisms                                                             | (lack of) |         |
| Feedback mechanisms                                                                | (lack of) |         |
| <b>INTERCOMMUNITY/ INTERORGANIZATIONAL/ INTERSECTORAL RELATIONSHIPS, n=5 (11%)</b> |           |         |
| Linking up the use of metrics to other functions                                   |           |         |
| Scale up of successfully run pilot projects                                        |           |         |
