# Supplementary material for: International multi-stakeholder collaboration to support implementation of cancer care efficiency metrics: A qualitative study to develop the All. Can Action Guide
Source: Research Square preprint supplement (doi:10.21203/rs.3.rs-6429529/v1), 2025-06-09
Supplement: Supplementary file 3 [file 309faf1b5f6b7871f6404974.pdf]

## Additional file 1 – Interview guide for the data collection

### Overview of follow-up interview regarding the All.Can Cancer Policy Heatmap Survey July 2023

The Health Services and Systems Research Group at the Amsterdam University Medical Centres (University of Amsterdam) is collaborating with [All.Can International to strengthen the implementation of cancer efficiency metrics](#). The research team is composed of Niek Klazinga, Dionne Kringos, Óscar Brito Fernandes, Erica Barbazza, Damir Ivanković and Ana Sofia Carvalho. The primary aim of this collaborative project is to create an *Efficiency Metrics Implementation Playbook* that provides a framework for the implementation of previously published cancer efficiency metric categories ([All.Can cancer efficiency metrics study](#)):

- Time to diagnosis
- Percentage of cancers diagnosed through emergency presentation
- Primary care interval\*
- Time from tissue diagnosis to treatment
- Percentage of patients documented as having seen a Clinical Nurse Specialist (CNS)
- Percentage of patients who received chemotherapy in the last 14 days of life
- Patient experience
- Patient involvement in decision-making

\* Primary care interval: number of days from date of first presentation in primary care with symptoms relevant to the final cancer diagnosis to date of first referral from primary care'

Following the recent All.Can International Cancer Policy Heatmap Survey, we would like to request your engagement in the development phase of the *Efficiency Metrics Implementation Playbook*. The engagement of All.Can National Initiatives and Members will take place via two rounds from July to September 2023.

- In **Round 1**, we would like to invite key informants to discuss the responses received to the All.Can International Cancer Policy Heatmap Survey.
  - In a virtual in-depth country-based discussion based on the answers to the All.Can International Policy survey, we want to explore: 1) how the cancer care pathway (early detection, diagnosis and staging, treatment, and outcomes) is implemented in your country and; 2) how cancer efficiency metrics are being considered.
  - Specifically about the All.Can cancer efficiency metrics, a presentation containing the key findings derived from the survey is available [here](#). An extended version of this presentation covering the full extent of the survey is also [available for your reference](#).
  - Additionally, we will ask for your support in identifying key informants for Round 2 of engaging with All.Can National Initiatives and Members.
- In **Round 2**, we seek to explore good practices in your country related to the implementation and use of cancer-related efficiency metrics.

For your information, and for you to prepare for the virtual in-depth discussion, below you will find some of the questions that will be explored. The questions are grouped into three general themes that draw from a re-clustering of the All.Can efficiency metrics from a *use* perspective.

| Theme                                                                        | Leading questions                                                                                                                                                                                                                                                                                                                                                                                                                                                                                                                                                                                                                                                                                                                                                                                                             |
|------------------------------------------------------------------------------|-------------------------------------------------------------------------------------------------------------------------------------------------------------------------------------------------------------------------------------------------------------------------------------------------------------------------------------------------------------------------------------------------------------------------------------------------------------------------------------------------------------------------------------------------------------------------------------------------------------------------------------------------------------------------------------------------------------------------------------------------------------------------------------------------------------------------------|
| Overview of uses and signalling functions of time related efficiency metrics | <ul style="list-style-type: none"> <li>Where in the cancer care pathway in your country is each of the 8 core efficiency metrics present? <ul style="list-style-type: none"> <li>What are their functions?</li> <li>Who needs (uses) this information?</li> </ul> </li> <li>Many of the core efficiency metrics capture whether certain actions are done in/on time. How are these data recorded in existing cancer registries or databases to calculate these metrics? <ul style="list-style-type: none"> <li>Is a patient identifier available to allow database linkages?</li> </ul> </li> <li>Are staging data being collected? Where and by whom? <ul style="list-style-type: none"> <li>Do you use a patient identifier with capabilities of linking this information to other cancer databases?</li> </ul> </li> </ul> |
| Workforce                                                                    | <ul style="list-style-type: none"> <li>Are multidisciplinary teams (MDT) institutionalised in your country's cancer care pathway? <ul style="list-style-type: none"> <li>How are MDT operationalised?</li> <li>What professional roles are included in MDT? <ul style="list-style-type: none"> <li>Is oncology nurse a specialty in your country?</li> </ul> </li> </ul> </li> <li>Is sharing responsibilities (task shifting) occurring at any stage of the cancer care pathway?</li> </ul>                                                                                                                                                                                                                                                                                                                                  |
| Patient-centred perspective (PROMs/PREMs)                                    | <ul style="list-style-type: none"> <li>Are patient-reported outcome and experience measures collected across the cancer care pathway? <ul style="list-style-type: none"> <li>If yes, what method is employed (e.g., nationally or internationally standardised survey/measures)?</li> <li>Are these data embedded in existing cancer registries or databases?</li> <li>Are these data collected in a systematic manner?</li> </ul> </li> </ul>                                                                                                                                                                                                                                                                                                                                                                                |

### Output of your participation and confidentiality

Your participation will help create an “Efficiency Metrics Implementation Playbook” closer to the expectations and needs of All.Can National Initiatives and Members. The discussions from the interviews will be embedded anonymously for the purpose of developing the Playbook, including any written outputs related to the project, such as reports and research articles. Your personal details will be handled with strict confidentiality and will be used by the organisers only for coordination purposes. You will be asked to provide your consent before the beginning of the event to confirm your understanding and agreement to participate.

### Location, time, language

The interview will be **held virtually** and will last **up to 60 minutes**. [Please use this link to select a day/time that suits you](#). Once a date/time has been agreed, we will share a link to the meeting. The meeting will be recorded for the purposes of detailed note taking. The discussions will be held in English. Yet, any follow-up written responses may be in the language preference of responding informants.

If you have any questions regarding the All.Can Cancer Efficiency Metrics Implementation Playbook and your participation, do not hesitate to reach out to the research team via:

Óscar Brito Fernandes  
Health Services and Systems Postdoctoral Researcher  
Amsterdam UMC, University of Amsterdam
