# Supplementary material for: International multi-stakeholder collaboration to support implementation of cancer care efficiency metrics: A qualitative study to develop the All. Can Action Guide
Source: Research Square preprint supplement (doi:10.21203/rs.3.rs-6429529/v1), 2025-06-09
Supplement: Supplementary file 6 [file 605df46bee46b41e1b66745c.pdf]

**Additional file 6 – Overview of the informants by study phase**

| Characteristics of informants       | Informants from phase 1 of data collection (N=31) |     | Informants from phase 2 of data collection (N=9) |     |
|-------------------------------------|---------------------------------------------------|-----|--------------------------------------------------|-----|
|                                     | n                                                 | %   | n                                                | %   |
| <b>Healthcare system level</b>      | n                                                 | %   | n                                                | %   |
| Micro (clinical)                    | 5                                                 | 16% | 3                                                | 33% |
| Meso (organisational)               | 1                                                 | 3%  | 6                                                | 67% |
| Macro (policy)                      | 27                                                | 87% | 0                                                | 0   |
| Cross-cutting (research)            | 3                                                 | 10% | 0                                                | 0   |
| <b>Background and affiliation</b>   | n                                                 | %   | n                                                | %   |
| Healthcare professional             | 12                                                | 39% | 4                                                | 44% |
| Association (patient, professional) | 10                                                | 32% | 0                                                | 0%  |
| Industry health company             | 9                                                 | 29% | 2                                                | 22% |
| Researcher                          | 6                                                 | 19% | 4                                                | 44% |
| Association (patient)               | 5                                                 | 16% | 0                                                | 0%  |
| Government health agency            | 2                                                 | 6%  | 2                                                | 22% |
| Policy-maker                        | 1                                                 | 3%  | 0                                                | 0%  |
| Association (professional)          | 1                                                 | 3%  | 0                                                | 0%  |
| <b>Gender</b>                       | n                                                 | %   | n                                                | %   |
| Female                              | 14                                                | 45% | 7                                                | 78% |
| Male                                | 17                                                | 55% | 2                                                | 22% |
| <b>Location per continent</b>       | n                                                 | %   | n                                                | %   |
| Europe                              | 12                                                | 39% | 6                                                | 67% |
| Asia                                | 4                                                 | 13% | 0                                                | 0%  |
| South America                       | 2                                                 | 6%  | 1                                                | 11% |
| North America                       | 2                                                 | 6%  | 2                                                | 22% |
| Oceania                             | 1                                                 | 3%  | 0                                                | 0%  |
