# Supplementary material for: International multi-stakeholder collaboration to support implementation of cancer care efficiency metrics: A qualitative study to develop the All. Can Action Guide
Source: Research Square preprint supplement (doi:10.21203/rs.3.rs-6429529/v1), 2025-06-09
Supplement: Supplementary file 7 [file 6e5845cd88b185d2751a64c2.pdf]

**Additional file 1 – Research team characteristics and reflexivity statement following the consolidated criteria for reporting qualitative studies (COREQ)**

Considering the consolidated criteria for reporting qualitative studies (COREQ) guidelines (1), we present the table below to specify the personal characteristics and relationship with participants of the research team.

**Domain 1: Research team and reflexivity**

| <i>Personal Characteristics</i> |                                                                                                                                                                                                                                                                                                                                                                                                                                                                                                                                                                                                                                                                                                                                                                                                                                                                                                                                                             |
|---------------------------------|-------------------------------------------------------------------------------------------------------------------------------------------------------------------------------------------------------------------------------------------------------------------------------------------------------------------------------------------------------------------------------------------------------------------------------------------------------------------------------------------------------------------------------------------------------------------------------------------------------------------------------------------------------------------------------------------------------------------------------------------------------------------------------------------------------------------------------------------------------------------------------------------------------------------------------------------------------------|
| 2. Credentials                  | ASVC: MD MScPH<br>OBF: PhD<br>DI: PhD<br>EB: PhD<br>EP: Law degree<br>NK: MD PhD<br>DK: PhD                                                                                                                                                                                                                                                                                                                                                                                                                                                                                                                                                                                                                                                                                                                                                                                                                                                                 |
| 3. Occupation                   | ASVC: Doctoral student<br>OBF: Assistant Professor<br>DI: Consultant<br>EB: Consultant<br>EP: CEO<br>NK: Emeritus Professor<br>DK: Associate Professor                                                                                                                                                                                                                                                                                                                                                                                                                                                                                                                                                                                                                                                                                                                                                                                                      |
| 4. Gender                       | ASVC: Female<br>OBF: Male<br>DI: Male<br>EB: Female<br>EP: Male<br>NK: Male<br>DK: Female                                                                                                                                                                                                                                                                                                                                                                                                                                                                                                                                                                                                                                                                                                                                                                                                                                                                   |
| 5. Experience and training      | <p>ASVC: clinical background in internal medicine and doctoral student on healthcare systems performance assessment<br/> OBF: expert on health systems performance measurement and citizen-driven health systems performance<br/> DI: expert on health systems performance measurement and health information systems<br/> EB: expert on on health systems performance measurement and on actionability and implementation of performance indicators<br/> EP: international experience in senior roles for global healthcare companies and associations in the area of health and pharmaceutical policy and legislation<br/> NK: senior expert in health systems performance measurement and management<br/> DK: senior expert in health systems performance measurement and management</p> <p>ASVC was trained in qualitative research methods.<br/> OBF, DI, EB, NK and DK were trained and are experienced in applying qualitative research methods.</p> |

|                                             |                                                                                                                                                                                                                                                                                                                                                                                                                                                                                                                                                                             |
|---------------------------------------------|-----------------------------------------------------------------------------------------------------------------------------------------------------------------------------------------------------------------------------------------------------------------------------------------------------------------------------------------------------------------------------------------------------------------------------------------------------------------------------------------------------------------------------------------------------------------------------|
| <i>Relationship with participants</i>       |                                                                                                                                                                                                                                                                                                                                                                                                                                                                                                                                                                             |
| 6. Relationship established                 | <p>The research team who conducted the interviews, designed the study and drafted the manuscript had no previous relationship with any of the interviewees.</p> <p>EP works directly with the participants as they are part of the national initiatives of All.Can International, but has not participated in any of the interviews.</p>                                                                                                                                                                                                                                    |
| 7. Participant knowledge of the interviewer | <p>The participants did not know the researchers prior to the study commencement, with exception of EP, who is CEO of All.Can Internation, but who was not involved in the data collection.</p>                                                                                                                                                                                                                                                                                                                                                                             |
| 8. Interviewer characteristics              | <p>At the start of each interview, the study's aim and goals were presented by the interviewers. The interviewers introduced themselves and shared details about their roles, research interests, and professional background. This disclosure may have influenced participants' perceptions of the team.</p> <p>In order to reduce potential bias, whether from the interviewer or the respondent, the research team provided context for each question, ensured they were precise and focused, and tailored them to the respondent's role and organisational context.</p> |

## References

- 1) Tong A, Sainsbury P, Craig J. Consolidated criteria for reporting qualitative research (COREQ): a 32-item checklist for interviews and focus groups. International journal for quality in health care. 2007;19(6):349-57
