# Supplementary material for: International multi-stakeholder collaboration to support implementation of cancer care efficiency metrics: A qualitative study to develop the All. Can Action Guide
Source: Research Square preprint supplement (doi:10.21203/rs.3.rs-6429529/v1), 2025-06-09
Supplement: Supplementary file 9 [file ec3a2b8b0a316dc2765dc0b1.pdf]

### Cluster X

|         | Meaning Units - Inductive Coding: Sub-category |                                                          |                        |                             | THEME - Deductive coding: Attributes of external health system level |                                                                        |                      |                       |                                                       |
|---------|------------------------------------------------|----------------------------------------------------------|------------------------|-----------------------------|----------------------------------------------------------------------|------------------------------------------------------------------------|----------------------|-----------------------|-------------------------------------------------------|
| Country | Quote                                          | Meaning unit -<br><b>ENABLER (open inductive coding)</b> | Condensed meaning unit | Category (Inductive coding) | Community influences                                                 | Intercommunity/<br>interorganizational/<br>intersectoral relationships | Political influences | Regulatory influences | Regional/<br>national/<br>global influences on health |

### Cluster X

|         | Meaning Units - Inductive Coding: Sub-category |                                                          |                        |                             | THEME - Deductive coding: Attributes of external health system level |                                                                        |                      |                       |                                                       |
|---------|------------------------------------------------|----------------------------------------------------------|------------------------|-----------------------------|----------------------------------------------------------------------|------------------------------------------------------------------------|----------------------|-----------------------|-------------------------------------------------------|
| Country | Quote                                          | Meaning unit -<br><b>BARRIER (open inductive coding)</b> | Condensed meaning unit | Category (Inductive coding) | Community influences                                                 | Intercommunity/<br>interorganizational/<br>intersectoral relationships | Political influences | Regulatory influences | Regional/<br>national/<br>global influences on health |
